# Supplementary material for: High-Fat Diet Enhances Platelet Activation and Is Associated with Proprotein Convertase Subtilisin Kexin 9: An Animal Study
Source: MDPI journal article supplement (doi:10.3390/nu15204463), 2023-10-21
Supplement: s1 [file s1]

**Supplementary Table S1.** The nutritional information for the Regular Diet used in this study, specifically, HI-PRO-VITE BR 2-CP-5128 for the animal model.

| Component | Percentage        |
|-----------|-------------------|
| Water     | Max 13%           |
| Protein   | 19-21%            |
| Fat       | Min 5,0%          |
| Fiber     | Max 5,0 %         |
| Ash       | Max 7,0%          |
| Calcium   | Min 0,9%          |
| Phosphor  | Min 0,6%          |
| Alfatoxyn | Max 50 ppb        |
| Calories  | 3000-3100 Kcal/kg |
